# Supplementary material for: Evidence-based green algal genomics reveals marine diversity and ancestral characteristics of land plants
Source: PubMed Central journal article supplement (PMC4815162; doi:10.1186/s12864-016-2585-6), 2016-03-31

## Supplemental Figures

**CCMP1545 Chromosome 2 GC%**

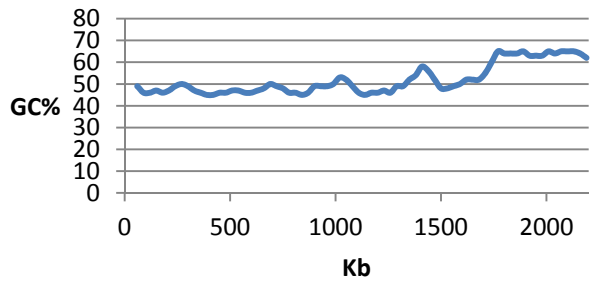

**CCMP1545 Chromosome 1 GC%**

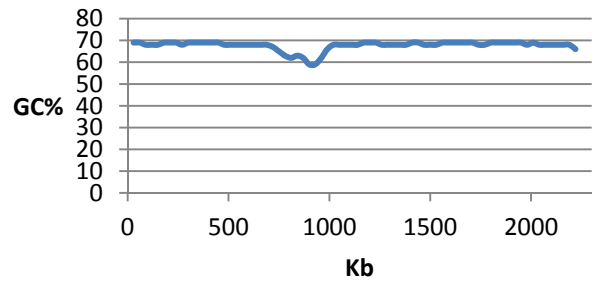

**RCC299 Chromosome 1 GC%**

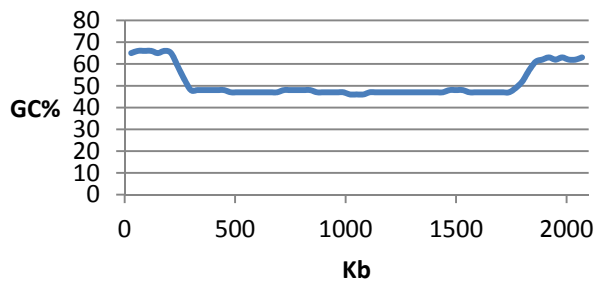

**RCC299 Chromosome 2 GC%**

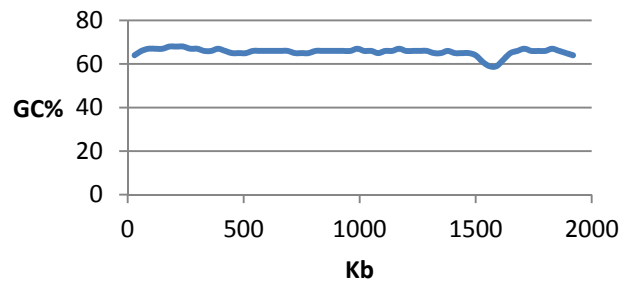

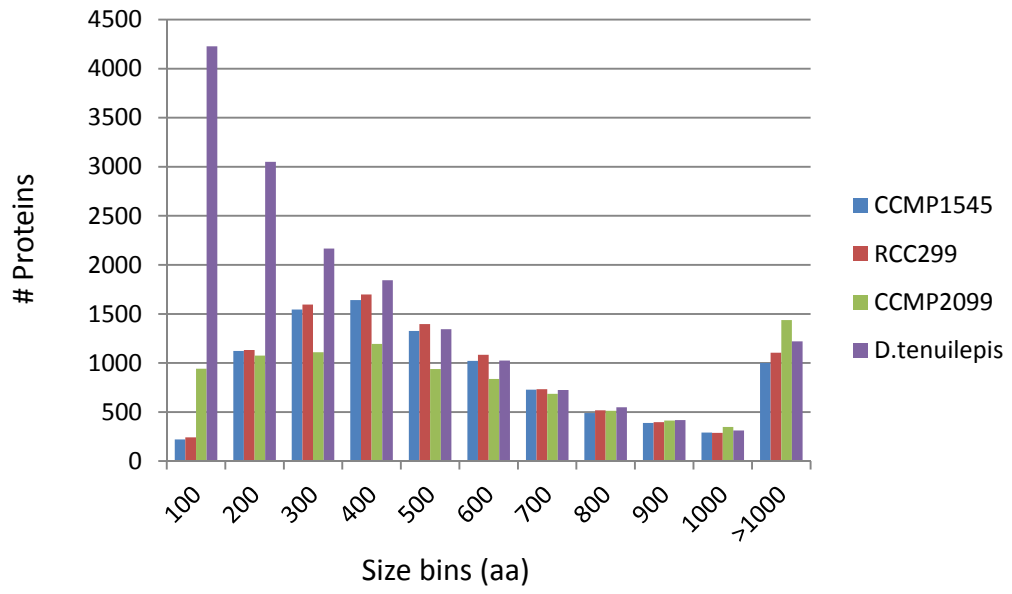

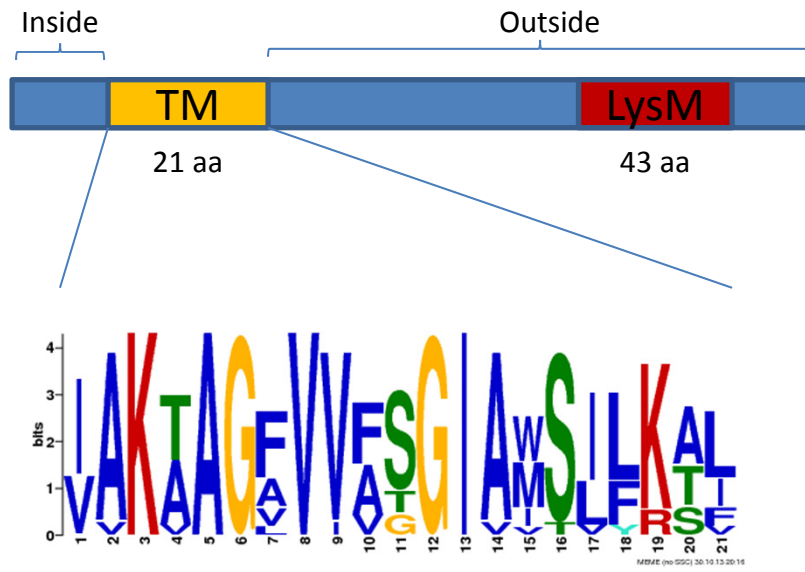

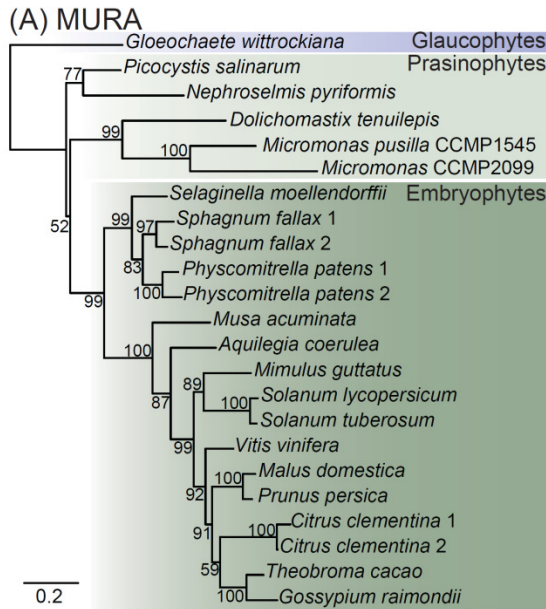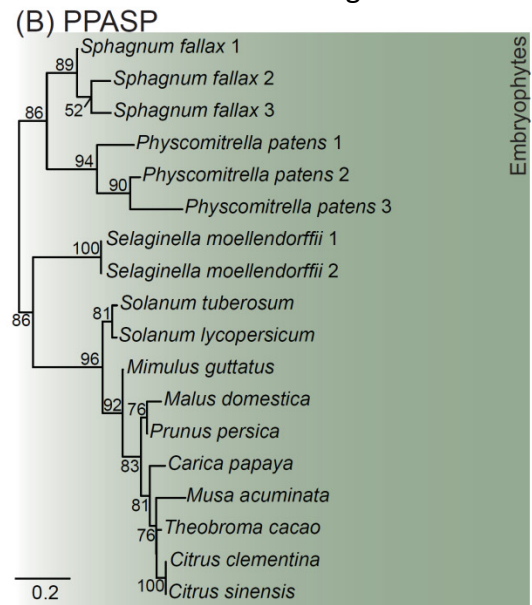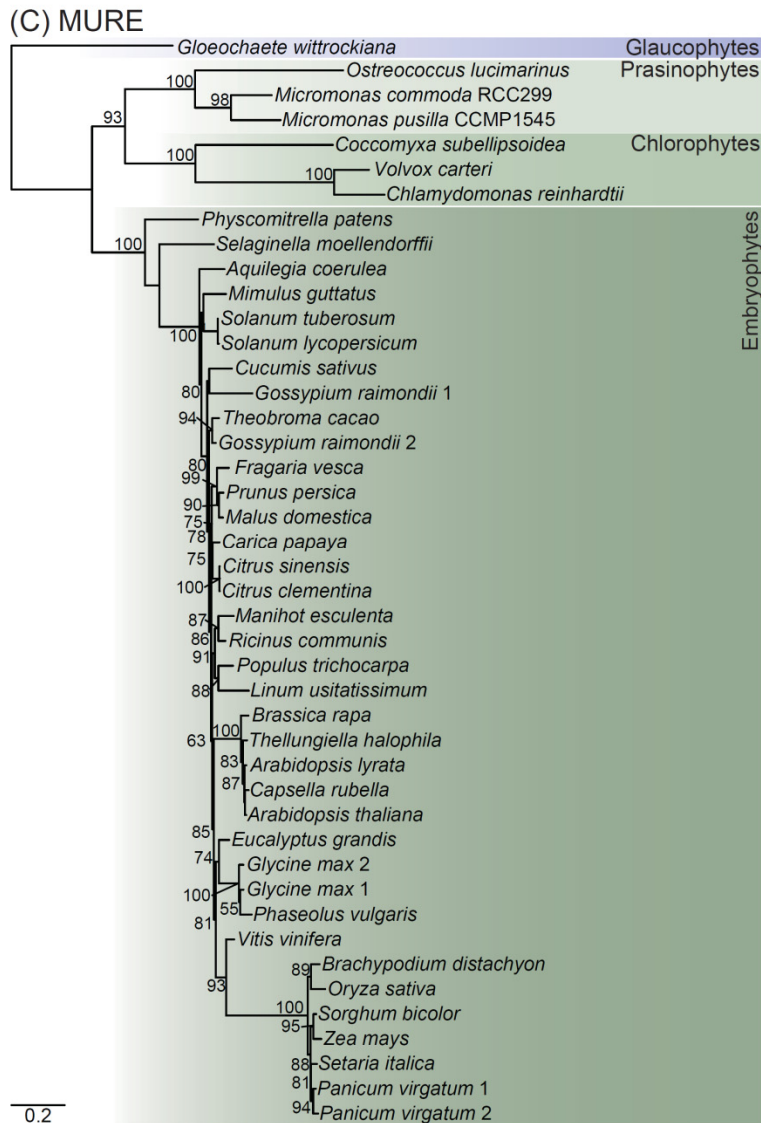

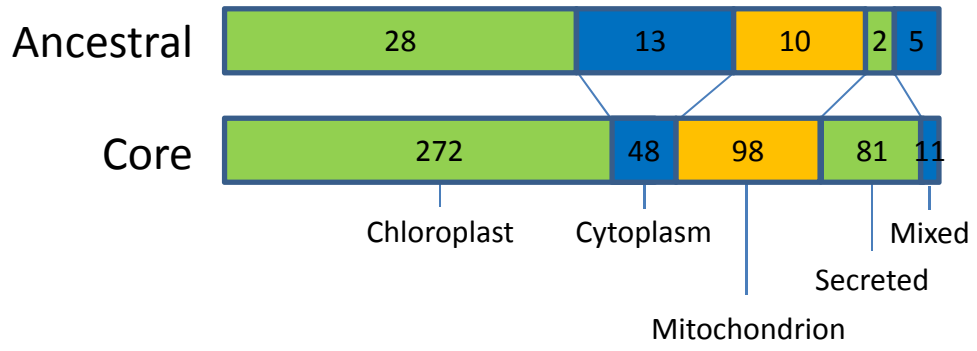

Supplement: 12864_2016_2585_MOESM2_ESM.pdf [file 12864_2016_2585_MOESM2_ESM.pdf]
